# Supplementary material
Source: MDPI journal article supplement (https://www.mdpi.com/search?q=molecules-28-05944)

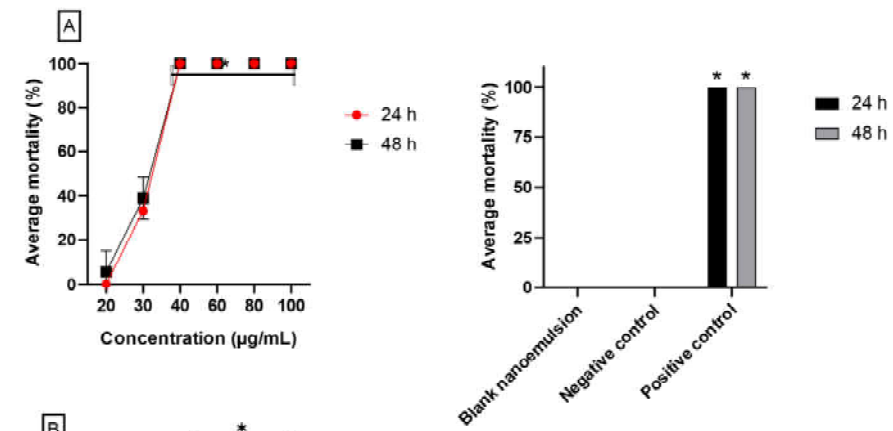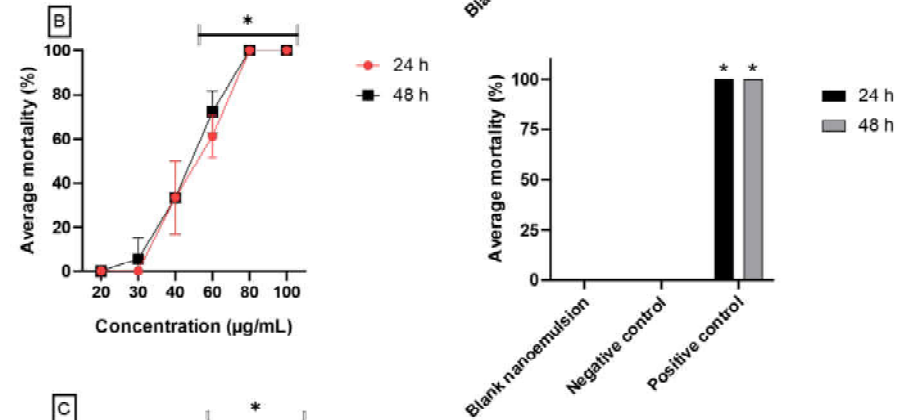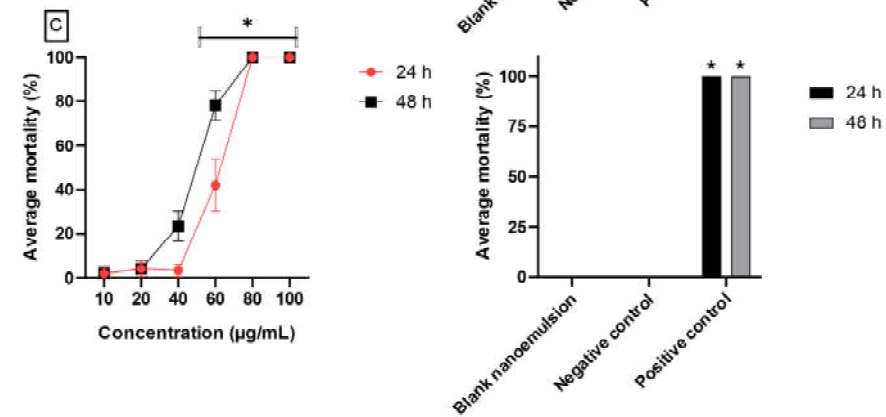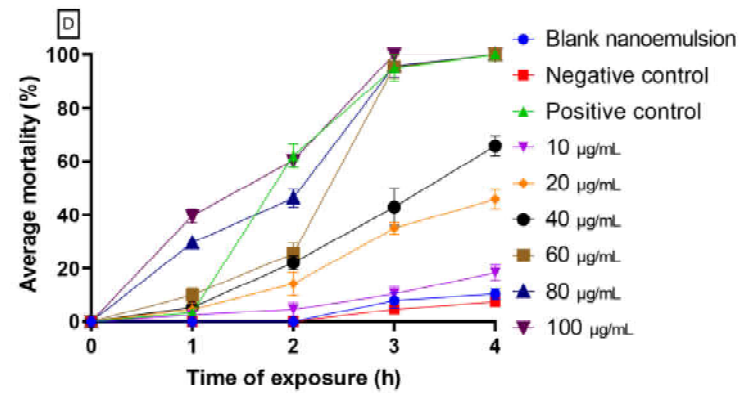

Supplement: s001 [file molecules-28-05944-s001.zip]
